# Supplementary material
Source: publisher figshare collection journal article supplement (https://plos.figshare.com/articles/dataset/_/918376)
Supplement: Supplementary file [file 1]

**Table S1.** Estimated parameters for the models fitted to the seedling recruitment data of *Silene ciliata* (cell size length 0.25 and 0.50 m)

| population        | kernel   | 0.25 m    |           |           |           |           | 0.50 m    |           |           |           |           |
|-------------------|----------|-----------|-----------|-----------|-----------|-----------|-----------|-----------|-----------|-----------|-----------|
|                   |          | $\delta$  | $u$       | $\beta$   | $\theta$  | $-\log L$ | $\delta$  | $u$       | $\beta$   | $\theta$  | $-\log L$ |
| Peñalara          | 2Dt      | 0.33      | 3.20      | 0.010     | 0.511     | 1034.26   | 0.34      | 7.15      | 0.010     | 0.87      | 556.65    |
|                   | Log-norm | 0.34      | 0.66      | 0.010     | 0.511     | 1035.41   | 0.36      | 0.76      | 0.010     | 0.87      | 558.06    |
|                   | WALD     | 0.34      | 0.68      | 0.010     | 0.510     | 1035.79   | 0.36      | 0.42      | 0.010     | 0.86      | 559.07    |
|                   | Exp-pow  | 0.32      | 1.21      | 0.010     | 0.509     | 1034.49   | 0.34      | 1.54      | 0.010     | 0.87      | 556.60    |
| Cabezas de Hierro | 2Dt      | 0.42      | 172.46    | 0.003     | 0.523     | 708.02    | 0.41      | 5.16      | 0.003     | 0.91      | 420.42    |
|                   | Log-norm | 0.42      | 0.50      | 0.003     | 0.531     | 706.53    | 0.43      | 0.62      | 0.003     | 0.91      | 420.47    |
|                   | WALD     | 0.42      | 1.49      | 0.003     | 0.531     | 706.48    | 0.43      | 1.09      | 0.003     | 0.91      | 420.69    |
|                   | Exp-pow  | 0.41      | 2789.58   | 0.003     | 0.524     | 705.73    | 0.40      | 1.70      | 0.003     | 0.90      | 420.51    |
| Nevero            | 2Dt      | 0.25      | 10.44     | 0.001     | 142.159   | 82.84     | 0.44      | 172.60    | 0.001     | 0.72      | 60.14     |
|                   | log-norm | 0.25      | 0.49      | 0.001     | 142.154   | 82.12     | 0.67      | 0.12      | 0.001     | 1.30      | 58.69     |
|                   | WALD     | 0.25      | 0.89      | 0.001     | 142.150   | 82.07     | 0.67      | 47.81     | 0.001     | 1.48      | 58.69     |
|                   | Exp-pow  | 0.25      | 2.10      | 0.001     | 142.053   | 82.85     | 0.56      | 398.50    | 0.001     | 0.96      | 59.05     |
| Najarra           | 2Dt      | <i>nc</i> | <i>nc</i> | <i>nc</i> | <i>nc</i> | <i>nc</i> | <i>nc</i> | <i>nc</i> | <i>nc</i> | <i>nc</i> | <i>Nc</i> |
|                   | Log-norm | <i>nc</i> | <i>nc</i> | <i>nc</i> | <i>nc</i> | <i>nc</i> | <i>nc</i> | <i>nc</i> | <i>nc</i> | <i>nc</i> | <i>Nc</i> |
|                   | WALD     | <i>nc</i> | <i>nc</i> | <i>nc</i> | <i>nc</i> | <i>nc</i> | <i>nc</i> | <i>nc</i> | <i>nc</i> | <i>nc</i> | <i>Nc</i> |
|                   | Exp-pow  | 0.72      | 0.47      | 0.002     | 0.230     | 337.85    | 0.99      | 0.33      | 0.002     | 0.50      | 225.73    |
| Laguna            | 2Dt      | 0.25      | 172.44    | 0.001     | 0.003     | 23.23     | 0.25      | 1.76      | 0.001     | 0.02      | 19.30     |
|                   | Log-norm | 0.28      | 0.36      | 0.001     | 0.003     | 23.24     | 0.24      | 0.76      | 0.001     | 0.02      | 19.29     |
|                   | WALD     | 0.27      | 1.89      | 0.001     | 0.003     | 23.22     | 0.24      | 0.33      | 0.001     | 0.02      | 19.24     |
|                   | Exp-pow  | 0.29      | 5.87      | 0.001     | 0.004     | 23.11     | 0.20      | 0.58      | 0.001     | 0.02      | 19.30     |

$\delta$ , mean dispersal distance (m);  $u$  shape parameter;  $\beta$ , fecundity parameter (seedlings/cm);  $\theta$ , negative binomial parameter;  $-\log L$ , log-likelihood; *nc* denotes models that did not converge.
