# Supplementary material
Source: publisher figshare collection journal article supplement (https://plos.figshare.com/articles/dataset/_/918376)
Supplement: Supplementary file [file 1]

**Table S2.** Estimated parameters for the four models fitted to the seedling recruitment data of *Armeria caespitosa*. (cell size length 0.25 and 0.50 m).

| population             | kernel   | 0.25 m    |           |           |           |           | 0.50 m    |           |           |           |           |
|------------------------|----------|-----------|-----------|-----------|-----------|-----------|-----------|-----------|-----------|-----------|-----------|
|                        |          | $\delta$  | $u$       | $\beta$   | $\theta$  | $-\log L$ | $\delta$  | $u$       | $\beta$   | $\theta$  | $-\log L$ |
| Cabezas de Hierro      | 2Dt      | 0.40      | 1.91      | 0.024     | 0.261     | 415.97    | 0.40      | 7.20      | 0.024     | 0.80      | 268.95    |
|                        | Log-norm | 0.34      | 0.84      | 0.024     | 0.259     | 415.96    | 0.43      | 0.61      | 0.024     | 0.80      | 268.62    |
|                        | WALD     | 0.34      | 0.40      | 0.024     | 0.256     | 416.10    | 0.43      | 0.96      | 0.024     | 0.80      | 268.74    |
|                        | Exp-pow  | 0.31      | 0.78      | 0.024     | 0.257     | 416.41    | 0.39      | 1.85      | 0.024     | 0.80      | 269.01    |
| Najarra                | 2Dt      | <i>nc</i> | <i>nc</i> | <i>nc</i> | <i>nc</i> | <i>nc</i> | <i>nc</i> | <i>nc</i> | <i>nc</i> | <i>nc</i> | <i>nc</i> |
|                        | Log-norm | <i>nc</i> | <i>nc</i> | <i>nc</i> | <i>nc</i> | <i>nc</i> | <i>nc</i> | <i>nc</i> | <i>nc</i> | <i>nc</i> | <i>nc</i> |
|                        | WALD     | <i>nc</i> | <i>nc</i> | <i>nc</i> | <i>nc</i> | <i>nc</i> | <i>nc</i> | <i>nc</i> | <i>nc</i> | <i>nc</i> | <i>nc</i> |
|                        | Exp-pow  | <i>nc</i> | <i>nc</i> | <i>nc</i> | <i>nc</i> | <i>nc</i> | <i>nc</i> | <i>nc</i> | <i>nc</i> | <i>nc</i> | <i>nc</i> |
| Loma                   | 2Dt      | 0.65      | 2.88      | 0.014     | 0.196     | 185.10    | 0.69      | 2.28      | 0.014     | 0.65      | 123.64    |
| Cabezas                | Log-norm | 0.82      | 1.14      | 0.014     | 0.225     | 184.52    | 0.92      | 1.21      | 0.014     | 0.76      | 123.30    |
|                        | WALD     | 0.73      | 0.40      | 0.014     | 0.219     | 184.84    | 0.67      | 1.26      | 0.014     | 0.60      | 124.43    |
|                        | Exp-pow  | 0.65      | 0.58      | 0.014     | 0.224     | 183.92    | 0.67      | 0.52      | 0.014     | 0.77      | 122.65    |
| Collado de las Vacas   | 2Dt      | 0.41      | 1.75      | 0.011     | 0.463     | 151.63    | 0.43      | 1.85      | 0.010     | 0.75      | 99.30     |
|                        | Log-norm | 0.32      | 0.98      | 0.011     | 0.458     | 152.05    | 0.34      | 0.77      | 0.010     | 0.84      | 99.19     |
|                        | WALD     | 0.33      | 0.18      | 0.011     | 0.424     | 152.79    | 0.36      | 0.41      | 0.010     | 0.85      | 98.63     |
|                        | Exp-pow  | 0.31      | 0.54      | 0.011     | 0.455     | 152.64    | 0.37      | 0.66      | 0.010     | 0.68      | 100.90    |
| Sierra de los Porrones | 2Dt      | 0.25      | 1.84      | 0.022     | 0.387     | 75.93     | 0.26      | 3.58      | 0.024     | 0.46      | 54.49     |
|                        | Log-norm | 0.22      | 0.88      | 0.021     | 0.396     | 76.01     | 0.28      | 0.50      | 0.023     | 0.57      | 53.51     |
|                        | WALD     | 0.23      | 0.20      | 0.021     | 0.417     | 75.79     | 0.28      | 0.99      | 0.023     | 0.57      | 53.59     |
|                        | Exp-pow  | 0.20      | 0.43      | 0.024     | 0.350     | 76.60     | 0.27      | 1.32      | 0.023     | 0.45      | 55.04     |

$\delta$ , mean dispersal distance (m);  $u$  shape parameter;  $\beta$  fecundity parameter (seedlings/cm);  $\theta$  negative binomial parameter;  $-\log L$ , log-likelihood; *nc* denotes models that did not converge.
